# Supplementary material for: High-pressure band-gap engineering and structural properties of van der Waals BiOCl nanosheets
Source: Royal Society of Chemistry journal article supplement (doi:10.1039/d4ra07692c), 2024-01-01
Supplement: d4ra07692c1.pdf [file d4ra07692c1.pdf]

## Supplementary Information (SI)

### High-pressure Band-Gap Engineering and Structural Properties of the van der Waals BiOCl Nanosheets

Yaqian Dan,<sup>a</sup> Meiyang Ye,<sup>d</sup> Weiwei Dong,<sup>\*b</sup> Yihang Yao,<sup>b,c</sup> Min Lian,<sup>a</sup> Mingyang Du,<sup>a</sup> Shuailing Ma,<sup>\*a</sup> Xiaodong Li,<sup>b</sup> Tian Cui<sup>1</sup>

<sup>a</sup>Institute of High-Pressure Physics, School of Physical Science and Technology, Ningbo University, Ningbo 315211, China

<sup>b</sup>Beijing Synchrotron Radiation Facility (BSRF), Institute of High Energy Physics, Chinese Academy of Sciences, Beijing, 100049, China

<sup>c</sup>University of Chinese Academy of Sciences, Beijing 100049, China

<sup>d</sup>College of Science, Hainan Tropical Ocean University, Sanya 572022, China

Corresponding author: [dongww@ihep.ac.cn](mailto:dongww@ihep.ac.cn); [mashuailing@nbu.edu.cn](mailto:mashuailing@nbu.edu.cn)

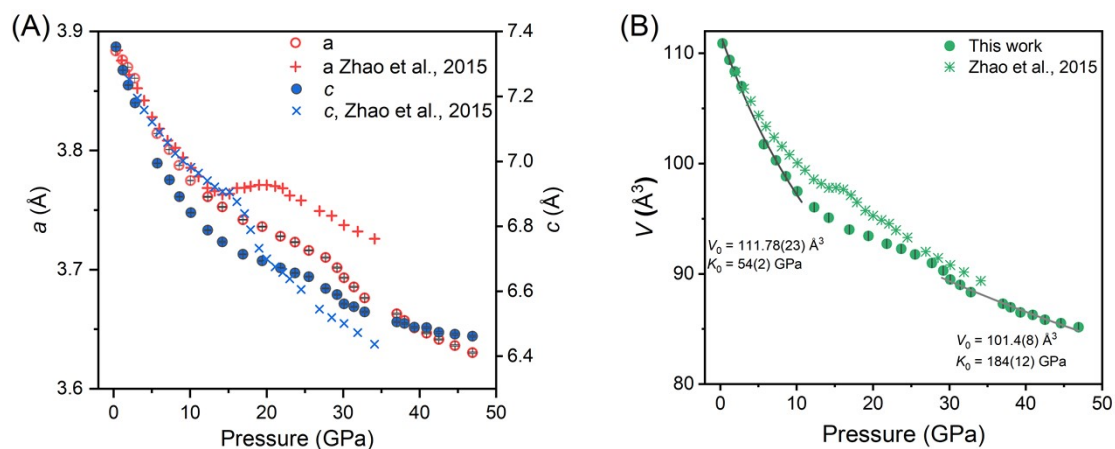

**Fig. S1** (A) Lattice parameters of  $a$  (red symbols) and  $c$  (blue symbols). (B) Experimental volume evolution with pressure. The determined equations of state (gray solid lines) by the 2<sup>nd</sup> order Birch-Murnaghan equation of state (BM2-EoS).  $V_0$  and  $K_0$  correspond volume and bulk modulus at ambient condition, respectively. The crosses and stars represent data from Zhao et al., 2015.<sup>1</sup>

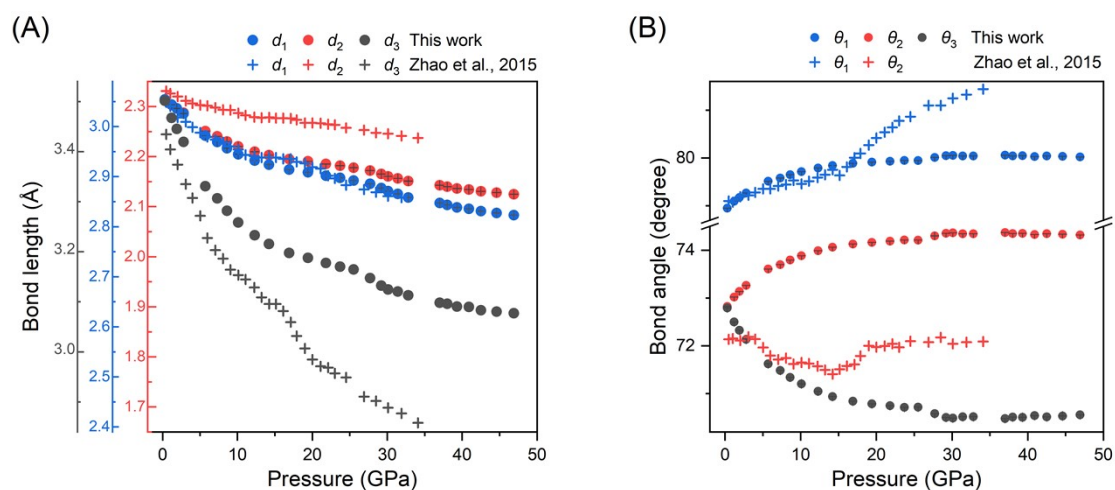

**Fig. S2** (A) Evolution of Bi-O and Bi-Cl bond lengths under compression. The relative values of the right and left axes are consistent. (B) Bond angles evolution of Cl-Bi-Cl, O-Bi-O and O-Bi-Cl, respectively. The crosses and stars represent data from Zhao et al., 2015.<sup>1</sup>

1. J. Zhao, L. Xu, Y. Liu, Z. Yu, C. Li, Y. Wang and Z. Liu, *The Journal of Physical Chemistry C*, 2015, **119**, 27657-27665.
